# Supplementary material for: The patatin-like phospholipase PfPNPLA2 is involved in the mitochondrial degradation of phosphatidylglycerol during Plasmodium falciparum blood stage development
Source: Front Cell Infect Microbiol. 2023 Nov 20;13:997245. doi: 10.3389/fcimb.2023.997245 (PMC10711835; doi:10.3389/fcimb.2023.997245)
Supplement: Supplementary file 2 [file Table_1.xlsx]

## Sheet: Tabelle1
Primer sequences (5'-3')
PF3D7_1358000
Cloning for pARL-HA-glmS	Fw primer	TAGCGCGGCCGCGGAAGAAGGCGATAAATTTGATCT	Restriction site: NotI	Amplified fragment size:	1015 bp
	Rev primer	TACGCCCTAGGTGTTTCTTTTTTAAAAAAGAAACATCTTAATAAGT	Restriction site: AvrII
Integration-PCR of the KD
5' Integration	Fw primer	TAAGAAGAAGAAGAAATTAATTCCTCC		Amplified fragment size:	1173 bp
	Rev primer	CCTTAGAGCTCGGCATAATCTGG
3' Integration	Fw primer	GCTTTACACTTTATGCTTCCGGCTCG		Amplified fragment size:	1578 bp
	Rev primer	TTACTTTTTTTTAATATCATTTTTACGTCC
Episome	Fw primer	GCTTTACACTTTATGCTTCCGGCTCG		Amplified fragment size:	1250 bp
	Rev primer	CCTTAGAGCTCGGCATAATCTGG
WT locus	Fw primer	TAAGAAGAAGAAGAAATTAATTCCTCC		Amplified fragment size:	1501 bp
	Rev primer	TTACTTTTTTTTAATATCATTTTTACGTCC
Rec. Protein for antibody	Fw primer	GCGTAGAATTCTCGATTAACATGGGATTGATG	Restriction site: EcoRI	Amplified fragment size:	1284 bp	AA 571 - 998	vector: pIH902 (MBP-Tag)
(#359)	Rev primer	TACGCCTGCAGTTAGACACTTAAAGGAGGTTCTTC	Restriction site: PstI
RT-PCR	Fw primer	CGAATTTTATGTCTAGATGG		Amplified fragment size:	250 bp
	Rev primer	ATCTGGTATTTCTTACAGCA
PF3D7_0924000
Rec. Protein for antibody	Fw primer	GCGTACCATGGATGCCACTTACCAAAAATAATGAAAAC	Restriction site: NcoI	Amplified fragment size:	525 bp	AA 589 - 763	vector: pET28c(+) (His-Tag)
(#378)	Rev primer	TACGCCTCGAGCATAAATCTATACACATTTTCTTT	Restriction site: XhoI
RT-PCR	Fw primer	AATACTATGGATTTTCAAGATAGCTT		Amplified fragment size:	250 bp
	Rev primer	CATCAATTTCATTTCCTAATACTCGA
PF3D7_0218600
Cloning for pARL-HA-glmS	Fw primer	TAGCGCGGCCGCCTCGCATCGATTGAATATGCTG	Restriction site: NotI	Amplified fragment size:	840 bp
	Rev primer	TACGCCCTAGGAAAACCAAAATATCCAGATAA	Restriction site: AvrII
Integration-PCR of the KD
5' Integration	Fw primer	ATGATTTAGGTAGGAGCGATGCTC		Amplified fragment size:	1120 bp
	Rev primer	CCTTAGAGCTCGGCATAATCTGG
3' Integration	Fw primer	GCTTTACACTTTATGCTTCCGGCTCG		Amplified fragment size:	1160 bp
	Rev primer	TGATAACTTCAAAAATAACATTATG
Episome	Fw primer	GCTTTACACTTTATGCTTCCGGCTCG		Amplified fragment size:	1075 bp
	Rev primer	CCTTAGAGCTCGGCATAATCTGG
WT locus	Fw primer	ATGATTTAGGTAGGAGCGATGCTC		Amplified fragment size:	1205 bp
	Rev primer	TGATAACTTCAAAAATAACATTATG
Rec. Protein for antibody	Fw primer	TAGCGAAGGATTTCATGTTTGAGCGTAGGATTAAGT	Restriction site: XmnI	Amplified fragment size:	424 bp	AA 704 - 804	vector: pMalc5x (MBP-Tag)
(#451)	Rev primer	TAGCCTGCAGATAATCAGAATCAAACGGAGATAC	Restriction site: PstI
Rec. Protein for antibody	Fw primer	TAGCGAAGGATTTCTGGTAATACGAACAGAAAAGATATA	Restriction site: XmnI	Amplified fragment size:	561 bp	AA 2 - 187	vector: pMalc5x (MBP-Tag)
(#460, #461)	Rev primer	TAGCCTGCAGTTAAATTTCTATTTTACATTTTGTAGTATC	Restriction site: PstI
RT-PCR	Fw primer	CATAATACACATAATATACATAATACACA		Amplified fragment size:	250 bp
	Rev primer	AACAACATGCACAGATACTAC
RT-PCR controls
Ama1	Fw primer	CGGTAGCTACGGGAAATCAA		Amplified fragment size:	407 bp
	Rev primer	AGGGCAAACTTTTTCCCAGT
CCp2	Fw primer	AGTTGTTGATGGGCTTTTGG		Amplified fragment size:	286 bp
	Rev primer	ATTCGGTGCCATTAGGGTTA
Aldolase	Fw primer	TAGATGGATTAGCAGAAAGATGC		Amplified fragment size:	378 bp
	Rev primer	AGAAACCAACCATCTTGAGTAGTGG
